# Supplementary material for: Molecular characteristics of organic matter derived from sulfonated biochar
Source: Royal Society of Chemistry journal article supplement (doi:10.1039/d4em00233d), 2024-01-01
Supplement: d4em00233d1.pdf [file d4em00233d1.pdf]

## Supporting Information for

### **Molecular characteristics of sulfonated biochar-derived organic matter**

Zhengfeng Jiang,<sup>a,b,d</sup> Chen He,<sup>\*b</sup> Fei Gao,<sup>a</sup> Quan Shi,<sup>\*b</sup> Yang Chen,<sup>e</sup> Haimeng Yu,<sup>b</sup>  
Zhimao Zhou<sup>c</sup> and Ruoxin Wang<sup>a</sup>

<sup>a</sup> *Petrochemical Research Institute, PetroChina Company Limited, Beijing 100195, China.*

<sup>b</sup> *State Key Laboratory of Heavy Oil Processing, China University of Petroleum, Beijing 102249, China.*

<sup>c</sup> *CAS Key Laboratory of Green Process and Engineering, Institute of Process Engineering, Chinese Academy of Sciences, Beijing 100190, PR China*

<sup>d</sup> *National Elite Institute of Engineering, CNPC, Beijing 100096, China*

<sup>e</sup> *Research Center for Atmospheric Environment, Chongqing Institute of Green and Intelligent Technology, Chinese Academy of Sciences, Chongqing 400714, China*

\*Corresponding Authors:

\*Chen He, State Key Laboratory of Heavy Oil Processing, China University of Petroleum, Beijing 102249, China (E-mail: hechen@cup.edu.cn)

\*Quan Shi, State Key Laboratory of Heavy Oil Processing, China University of Petroleum, Beijing 102249, China (E-mail: sq@cup.edu.cn).

**Text legends:**

Text S1 The detailed preparation procedure of the carbon materials.

Text S2 FT-ICR MS data-related parameters integration.

**Table legends:**

Table S1. The selected physicochemical properties of the carbon materials.

Table S2. BET of three carbon materials prepared from rice husk.

Table S3. Proportion of molecular formulas assigned to each compound class (calculated by molecular numbers).

**Figure legends:**

Figure S1. SEM images of different magnifications, (a-c) sulfonated biochar, (d-f) hydrochar, and (g-i) pyrochar.

Figure S2. Abundance of formulas-assigned peaks, as determined from FT-ICR MS analysis, categorized according to  $m/z$ .

Figure S3. Percentage of same molecular formula among all samples (different colors represent the percentage of cross-identical molecular formulas in different samples).

Figure S4. Relative abundance of heteroatom class species in sulfonated biochar-derived DOM obtained by FT-ICR MS.

Figure S5. Plot of DBE versus the number of O atoms of different dissolved organic matters.

Figure S6. Classification of compounds with unique molecular formulas in all DOMs.

### **Text S1 The detailed preparation procedure of the carbon materials**

The rice husks were cleaned with tap water, washed with deionized water for three times and dried naturally in a ventilated area, then baked in a constant temperature oven at 80°C for 12 h, and then pulverized in a pulverizer and passed through a 60-mesh sieve.

(1) As previously reported,<sup>1</sup> sulfonated biochar were prepared as follows: the waste sulfuric acid of alkylated (WSAA) (100 g, 1 mol) was put into a 500-mL flask, and then the rice husk powder (20 g) was added. The reaction mixture was heated in flowing procedure. The mixture was slowly heated to 180 °C and held for 3 h. At the end of the reaction, cooled the reaction system to room temperature. The resulted substance was washed sequentially by dilute sulfuric acid of 30 wt.%, 15 wt.% and 5 wt.%. And, the final residue was washed repeatedly with boiled deionized water (>80°C) to obtain sulfonated biochar. The sulfonated biochar were dried at 80°C during 12 h.

(2) Pyrochars were prepared as follows: The 20 g of rice husk powder was placed in a tube furnace (OTF-InoX-S, HF-Kejing Company, China) under nitrogen atmosphere, heated up to 300°C at 5°C·min<sup>-1</sup>, kept at a constant temperature of 300°C for 2 h, and then cooled down to room temperature.

(3) Hydrochars were prepared as follows: Approximate 20 g rice husk powder was placed in a 100 mL stainless steel reactor with a Lab Miniature Magnetic High Pressure Reactor (YZPR-100, Yanzheng Instrument Company, China) with following procedures: The mixture was slowly heated to 180 °C and held for 3 h at a pressure ranging from 2 to 3 MPa . At the end of the reaction, cooled the reaction system to room temperature. The aqueous solutions were filtered and the hydrochars were dried at 80°C during 12 h.

All prepared carbon materials, all of which were taken out for grinding and pass through 100-200-mesh (0.075-0.150 mm) sieves and stored in 500-mL amber glass bottles in 200-L desiccators.

## Text S2 FT-ICR MS data-related parameters integration

From the molecular formula ( $C_cH_hO_oN_nS_s$ ) assignments, the double bond equivalent (DBE) and modified aromaticity index ( $AI_{mod}$ ) can be expressed as Eqs. (1) and (2).<sup>2</sup>

The overall DBE distribution can be described in terms of the intensity-weighted average DBE ( $DBE_{wa}$ ), calculated according to Eqs. (3).

$$DBE = 1 + (2c - h + n)/2 \quad (1)$$

$$AI_{mod} = (1 + c - o/2 - h/2 - s)/(c - o/2 - n - s) \quad (2)$$

$$DBE_{wa} = \frac{\sum_i (I_i \times DBE_i)}{\sum_i I_i} \quad (3)$$

where  $c$ ,  $h$ ,  $n$ ,  $o$  and  $s$  refer to the stoichiometric numbers of carbon, hydrogen, nitrogen, oxygen, and sulfur atoms per formula, respectively.  $I_i$  and  $DBE_i$  are the relative intensity and DBE value of peak  $i$ , respectively.

$MLB_L\%$  was calculated by dividing the sum of intensity of molecular formulas with  $H/C \geq 1.5$  by the total intensity of molecular formulas.<sup>2-4</sup>

Carboxyl-rich alicyclic molecules (CRAMs) are usually related to refractory compounds.<sup>5</sup>  $CRAM\%$  was calculated by dividing the sum of intensity of molecular formulas with  $DBE/C = 0.3-0.68$ ,  $DBE/H = 0.2-0.95$ , and  $DBE/O = 0.77-1.75$  by the total intensity of molecular formulas.<sup>6</sup>

1 **Tables**

2

3 **Table S1.** The selected physicochemical properties of the carbon materials

| Samples            | C%    | H%   | O%    | N%   | S%   | H/C  | (N+O)/C | O/C  | Ash%  | Acidic groups (mmol/g) |
|--------------------|-------|------|-------|------|------|------|---------|------|-------|------------------------|
| Rice husk          | 39.12 | 5.42 | 44.37 | 0.66 | <0.1 | 1.66 | 0.87    | 0.85 | 15.98 | -                      |
| Sulfonated biochar | 47.90 | 4.29 | 33.57 | 0.58 | 6.34 | 1.07 | 0.54    | 0.53 | 25.09 | 4.01                   |
| Hydrochar          | 40.61 | 4.88 | 40.40 | 0.43 | <0.1 | 1.44 | 0.76    | 0.77 | 19.76 | 1.68                   |
| Pyrochar           | 48.77 | 4.02 | 32.48 | 0.72 | <0.1 | 0.99 | 0.52    | 0.50 | 8.01  | 1.69                   |

4

5 **Table S2.** BET of three carbon materials prepared from rice husk

| Sample             | Temperature °C | BET surface area, m <sup>2</sup> /g | Total pore volume, cm <sup>3</sup> /g | Average pore diameter, nm |
|--------------------|----------------|-------------------------------------|---------------------------------------|---------------------------|
| Sulfonated biochar | 180            | 7.70                                | 0.017                                 | 8.99                      |
| Hydrochar          | 180            | 8.90                                | 0.033                                 | 14.86                     |
| Pyrochar           | 300            | 1.54                                | 0.006                                 | 15.92                     |

6

7

8 **Table S3.** Proportion of molecular formulas assigned to each compound class  
 9 (calculated by molecular numbers).

| Sample                                     | RH              | PYC             | HYC             | SBC             |
|--------------------------------------------|-----------------|-----------------|-----------------|-----------------|
| Polycyclic aromatic (%)                    | 2.40<br>(138)   | 5.02<br>(246)   | 1.77<br>(87)    | 3.90<br>(139)   |
| Highly aromatic compounds (%)              | 9.98<br>(574)   | 20.25<br>(992)  | 16.55<br>(813)  | 4.38<br>(156)   |
| Highly unsaturated compounds (%)           | 53.82<br>(3095) | 54.97<br>(2693) | 62.79<br>(3085) | 50.59<br>(1801) |
| Unsaturated aliphatic compounds (%)        | 15.60<br>(897)  | 7.70<br>(377)   | 4.54<br>(223)   | 22.47<br>(800)  |
| Unsaturated aliphatic compounds (N)<br>(%) | 14.47<br>(832)  | 9.00<br>(441)   | 12.29<br>(604)  | 11.71<br>(417)  |
| Carbohydrates (%)                          | 0.00            | 0.00            | 0.00            | 0.25<br>(9)     |
| lipids and saturated compounds (%)         | 3.15<br>(181)   | 2.08<br>(102)   | 1.55<br>(76)    | 6.49<br>(231)   |
| Total number of molecules                  | (5751)          | (4899)          | (4913)          | (3560)          |

10

11

12 **Figures**

13

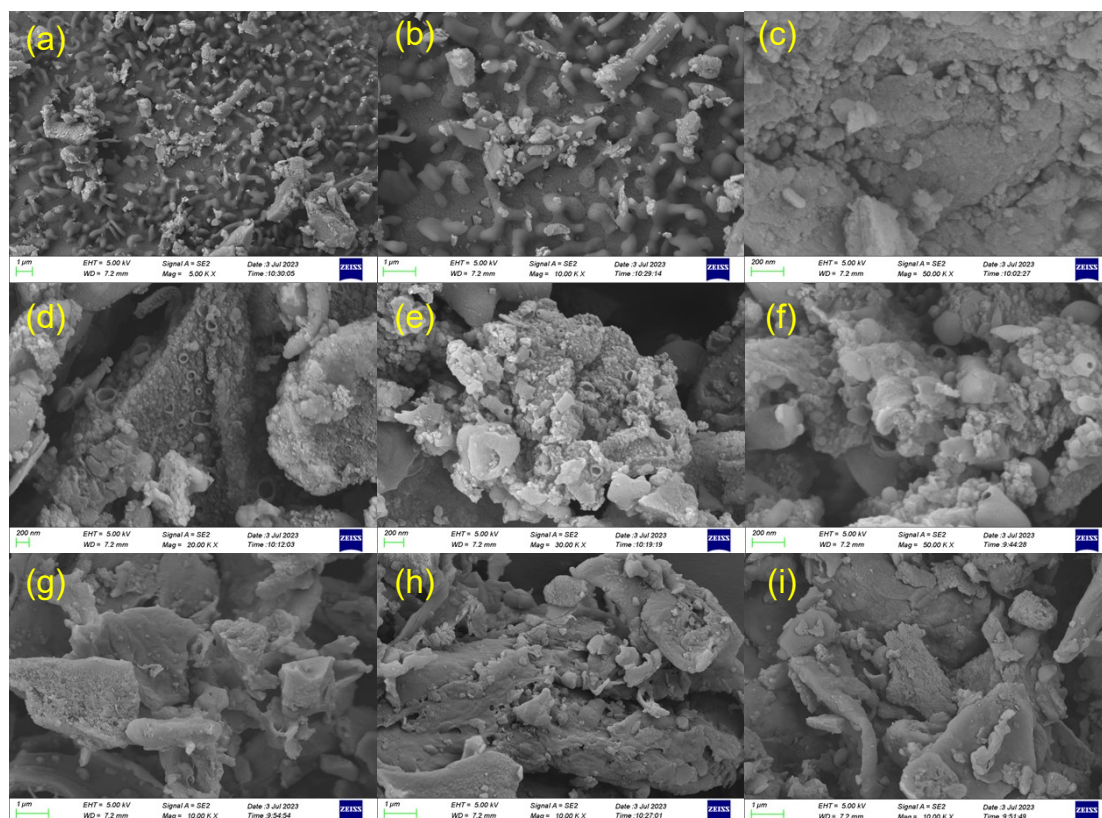

14

15 **Figure S1.** SEM images of different magnifications, (a-c) sulfonated biochar, (d-f)

16 hydrochar, and (g-i) pyrochar.

17

18

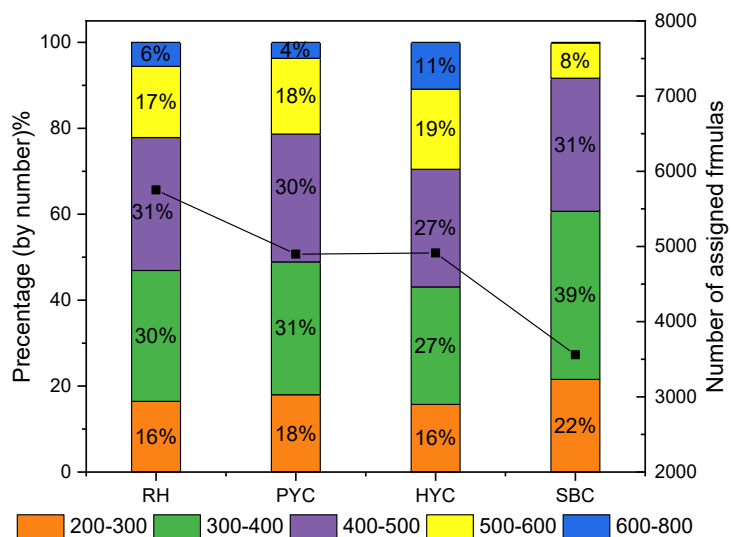

19

20 **Figure S2.** The number of formulas-assigned peaks, as determined from FT-ICR MS

21 analysis, categorized according to  $m/z$ .

22

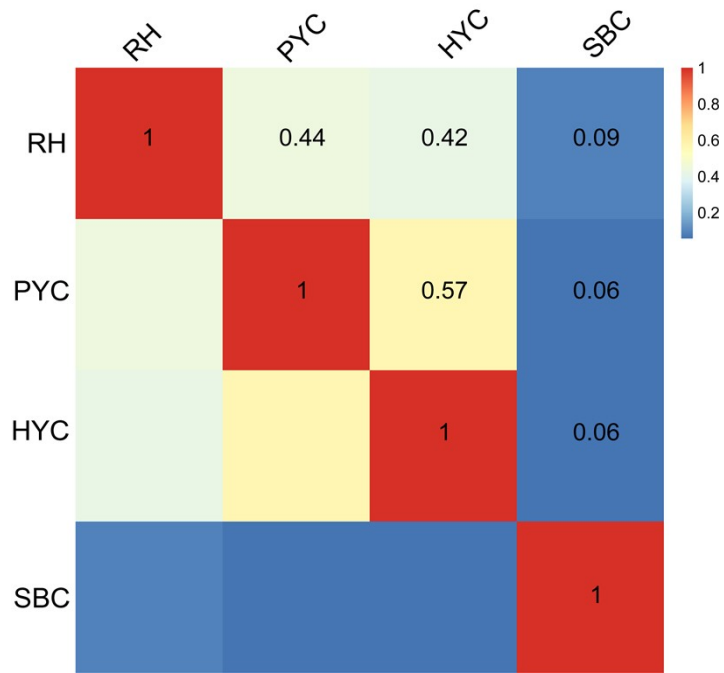

23

24 **Figure S3.** Percentage of same molecular formula among different samples (different  
 25 colors represent the percentage of cross-identical molecular formulas in different  
 26 samples).

27

28

29

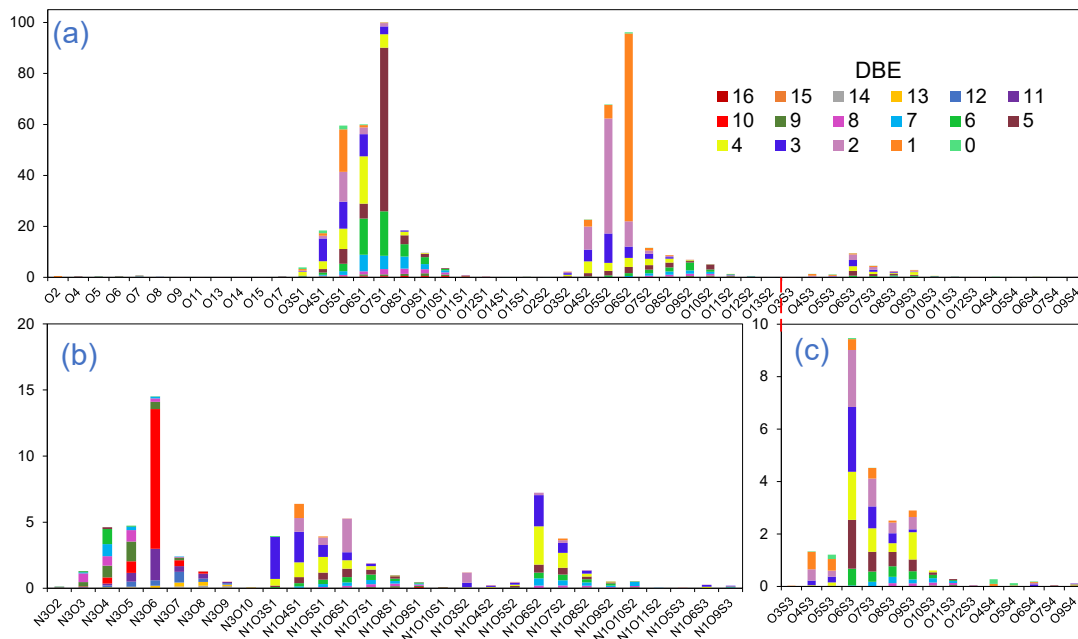

30

31 **Figure S4.** Relative abundance of heteroatom class species in sulfonated biochar DOM  
 32 obtained by FT-ICR MS.

33



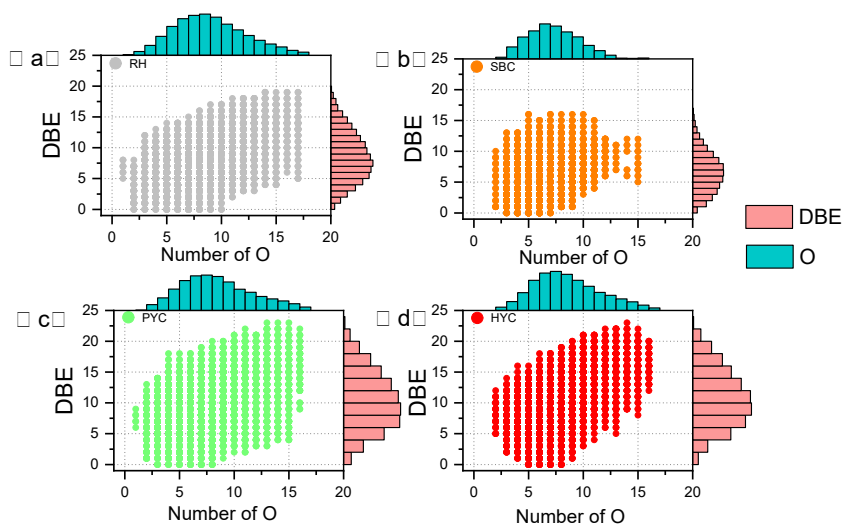

34  
 35 **Figure S5.** Plot of DBE versus the number of O atoms of DOM from different carbon  
 36 materials.  
 37  
 38

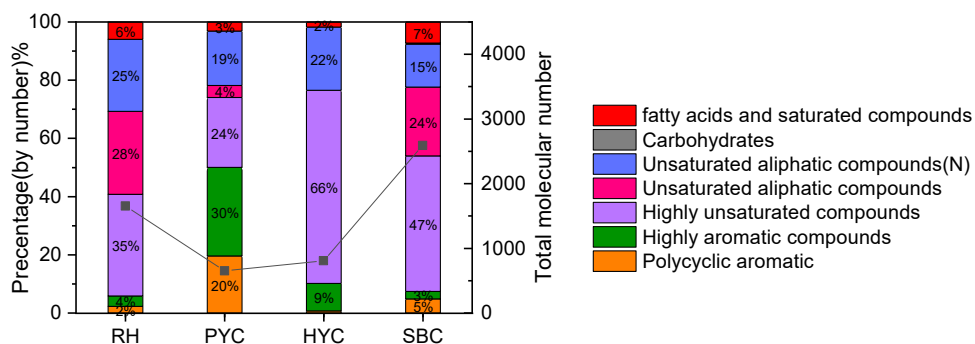

39  
 40 **Figure S6.** Classification of compounds with unique molecular formulas in all DOMs  
 41 (calculated by molecular numbers).  
 42  
 43  
 44

45 **Referfence**

- 46 1 Z. Zhou, D. Yao, S. Li, F. Xu, Y. Liu, R. Liu and Z. Chen, Sustainable production of value-  
47 added sulfonated biochar by sulfuric acid carbonization reduction of rice husks,  
48 *Environmental Technology & Innovation*, 2021, **24**, 102025.
- 49 2 Y. X. Tian, X. Guo, J. Ma, Q. Y. Liu, S. J. Li, Y. H. Wu, W. H. Zhao, S. Y. Ma, H. Y. Chen  
50 and F. Guo, Characterization of biochar-derived organic matter extracted with solvents of  
51 differing polarity via ultrahigh-resolution mass spectrometry, *Chemosphere*, 2022, **307**,  
52 135785.
- 53 3 J. D’Andrilli, W. T. Cooper, C. M. Foreman and A. G. Marshall, An ultrahigh-resolution  
54 mass spectrometry index to estimate natural organic matter lability, *Rapid Comm Mass*  
55 *Spectrometry*, 2015, **29**, 2385–2401.
- 56 4 Y. Wang, Y. Li, Y. Zhang and W. Wei, Effects of macromolecular humic/fulvic acid on  
57 Cd(II) adsorption onto reed-derived biochar as compared with tannic acid, *International*  
58 *Journal of Biological Macromolecules*, 2019, **134**, 43–55.
- 59 5 D. He, C. He, P. Li, X. Zhang, Q. Shi and Y. Sun, Optical and Molecular Signatures of  
60 Dissolved Organic Matter Reflect Anthropogenic Influence in a Coastal River, Northeast  
61 China, *J of Env Quality*, 2019, **48**, 603–613.
- 62 6 N. Hertkorn, R. Benner, M. Frommberger, P. Schmitt-Kopplin, M. Witt, K. Kaiser, A.  
63 Kettrup and J. I. Hedges, Characterization of a major refractory component of marine  
64 dissolved organic matter, *Geochimica et Cosmochimica Acta*, 2006, **70**, 2990–3010.
- 65
